# Supplementary material
Source: publisher figshare collection journal article supplement (https://aacr.figshare.com/articles/dataset/_/22431621)

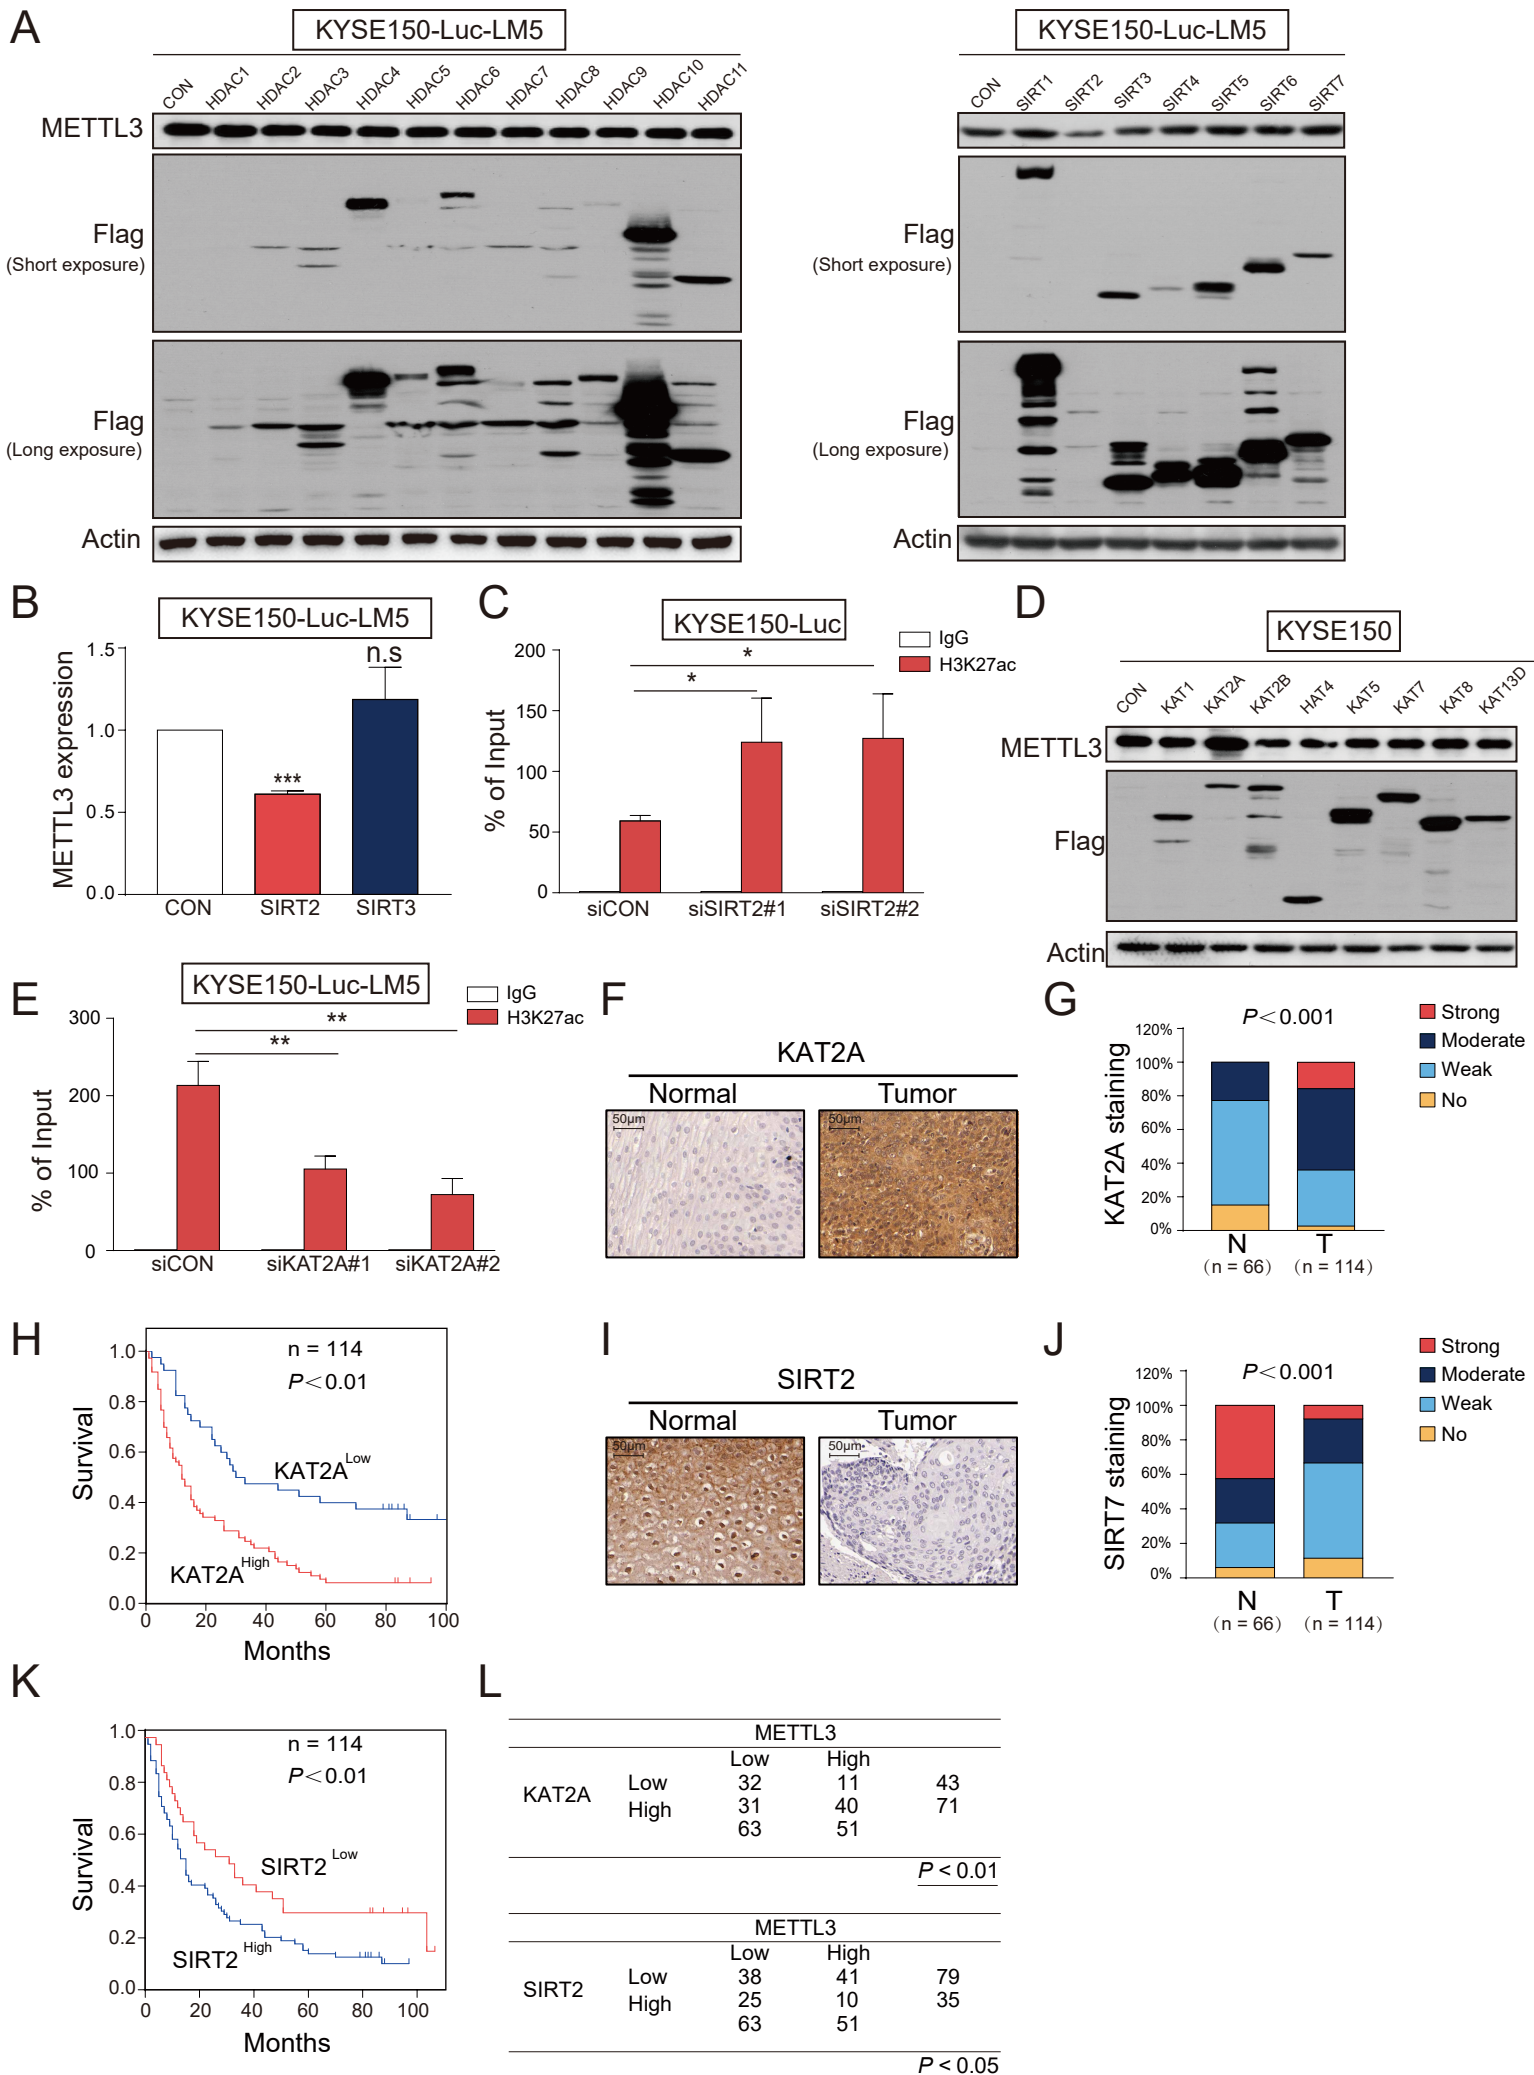

Supplementary Figure 2

Supplement: Supplementary file 1 [file 39877983]
